# Supplementary material for: Overweight or obese BMI is associated with earlier, but not later survival after common acute illnesses
Source: PubMed Central journal article supplement (PMC5801673; doi:10.1186/s12877-018-0726-2), 2018-02-06
Supplement: 12877_2018_726_MOESM1_ESM.pdf [file 12877_2018_726_MOESM1_ESM.pdf]

## Additional files

**Manuscript Title:** Overweight and obese BMI is associated with earlier, but not later survival after common acute illnesses

|                                                                                                                       |         |
|-----------------------------------------------------------------------------------------------------------------------|---------|
| <b>Table S1:</b> Cohort Definitions                                                                                   | Page 2  |
| <b>Figure S1:</b> Cohort Selection and Exclusions                                                                     | Page 3  |
| <b>Table S2:</b> Characteristics of CHF Patients and Hospitalizations, by BMI                                         | Page 4  |
| <b>Table S3:</b> Characteristics of Pneumonia Patients and Hospitalizations, by BMI                                   | Page 5  |
| <b>Table S4:</b> Characteristics of AMI Patients and Hospitalizations, by BMI                                         | Page 6  |
| <b>Table S5:</b> Numbers and Adjusted Hazards (or Odds) Ratios for Mortality in Primary and Sensitivity Analyses      | Page 7  |
| <b>Table S6:</b> Adjusted Hazard Ratios from Primary Analysis, by overweight, obese, and severely obese BMI           | Page 9  |
| <b>Table S7:</b> Adjusted Hazard Ratios from Primary Analysis, with referent BMI 20.0 to <25.0, and BMI 22.0 to <25.0 | Page 10 |

**Table S1: Cohort Definitions**

| Cohort                                             | Definition                                                                                                                                                                                                                                                                                                                                                             |
|----------------------------------------------------|------------------------------------------------------------------------------------------------------------------------------------------------------------------------------------------------------------------------------------------------------------------------------------------------------------------------------------------------------------------------|
| Congestive Heart Failure Exacerbation <sup>1</sup> | Principal ICD-9-CM code for 402.01, 402.11, 402.91, 404.01, 404.03, 404.11, 404.13, 404.91, 404.93, or 428.x                                                                                                                                                                                                                                                           |
| Acute Myocardial Infarction <sup>2,3</sup>         | Principal ICD-9-CM code for 410.x with length of stay >1 day or in-patient death.                                                                                                                                                                                                                                                                                      |
| Pneumonia <sup>4,5</sup>                           | Principal ICD-9-CM code for pneumonia (480.0-480.3, 480.8, 480.9, 481, 482.1, 482.2, 482.30-482.32, 482.39-482.41, 482.49, 482.81-482.84, 482.89, 482.9, 483.0, 483.1, 483.8, 485, 486, 487.0) or principal ICD-9-CM code for sepsis (038.0-038.9, 785.52, 995.91, 995.92) or respiratory failure (518.81, 518.82, 518.84, 799.1) with a secondary code for pneumonia. |

**Figure S1:** Cohort Section and Exclusions

Of 82,614 total Medicare hospitalizations among HRS participants, 5,078, 4,945, and 2,513 were for CHF, Pneumonia, and AMI, respectively. We excluded hospitalizations without prior data on weight or any data on height (14-17% across cohorts). We then excluded patients with missing data for age, gender, education, or marital status (<4% for each cohort).

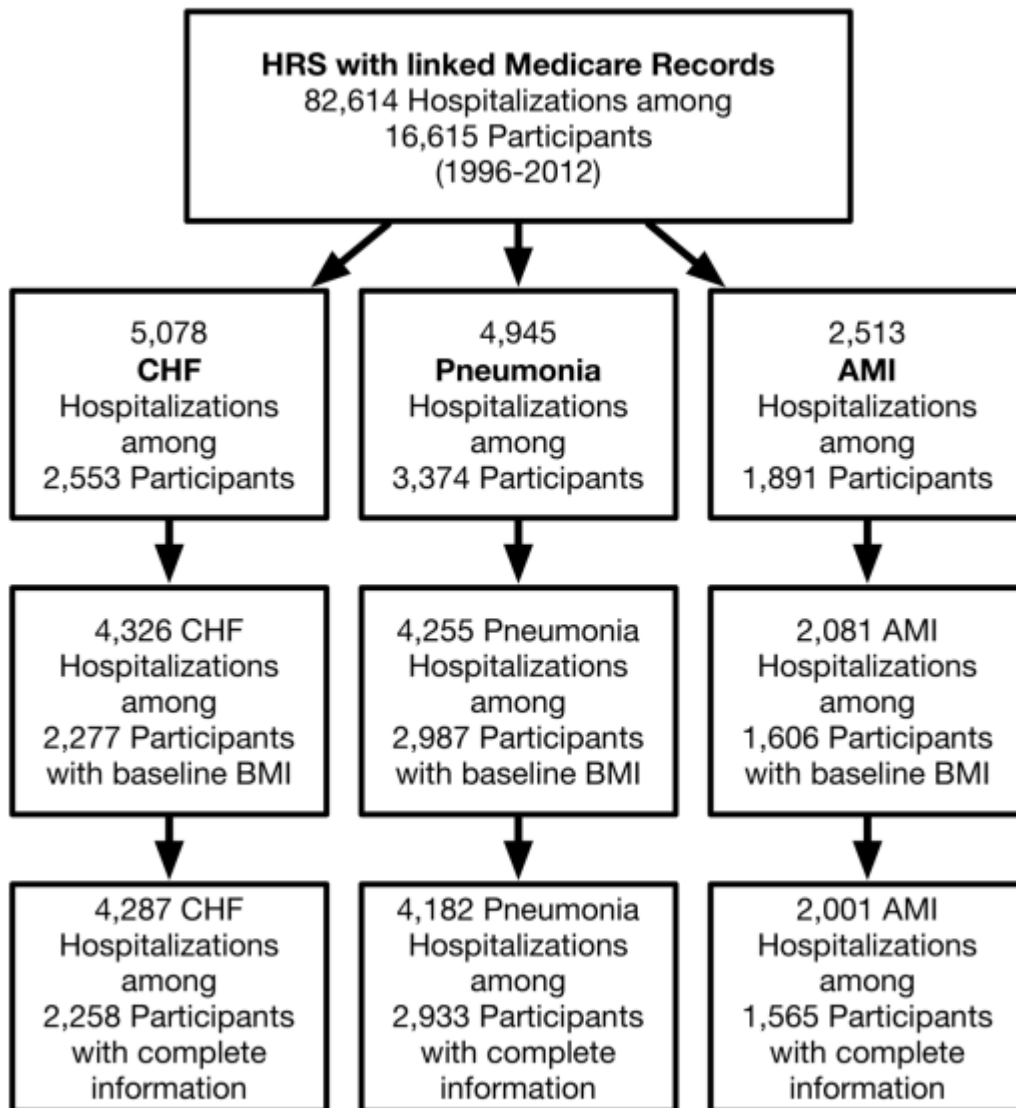

**Table S2:** Characteristics of CHF Patients and Hospitalizations, by BMI

|                                                   | Normal<br>BMI<br>N=1,538 | Overweight or Obese<br>BMI<br>N=2,584 | p-value |
|---------------------------------------------------|--------------------------|---------------------------------------|---------|
| Age (years), median (IQR)                         | 82 (76-88)               | 76 (70-83)                            | <0.001  |
| Male, N(%)                                        | 636 (41.4%)              | 1,178 (45.9%)                         | 0.008   |
| Race, N(%)                                        |                          |                                       | <0.001  |
| White/Caucasian                                   | 1,250 (81.3%)            | 1,845 (71.4%)                         |         |
| Black/African American                            | 249 (16.2%)              | 653 (25.3%)                           |         |
| Other                                             | 39 (2.5%)                | 86 (3.3%)                             |         |
| Married/Partnered, N(%)                           | 642 (41.7%)              | 1,273 (49.3%)                         | <0.001  |
| Wealth, N(%)                                      |                          |                                       | <0.001  |
| Net neg. or zero                                  | 170 (11.1%)              | 397 (15.4%)                           |         |
| Quartile 1                                        | 460 (29.9%)              | 954 (36.9%)                           |         |
| Quartile 2                                        | 411 (26.7%)              | 574 (22.2%)                           |         |
| Quartile 3                                        | 283 (18.4%)              | 376 (14.6%)                           |         |
| Quartile 4                                        | 214 (13.9%)              | 283 (11.0%)                           |         |
| Income, N(%)                                      |                          |                                       | 0.001   |
| None                                              | 637 (41.4%)              | 934 (36.2%)                           |         |
| Quartile 1                                        | 514 (33.4%)              | 886 (34.3%)                           |         |
| Quartile 2                                        | 278 (18.1%)              | 526 (20.4%)                           |         |
| Quartile 3                                        | 87 (5.7%)                | 163 (6.3%)                            |         |
| Quartile 4                                        | 22 (1.4%)                | 75 (2.9%)                             |         |
| Weighted Charlson Index                           | 4 (2-6)                  | 4 (3-6)                               | <0.001  |
| Congestive Heart Failure                          | 1,538 (100%)             | 2,584 (100%)                          | 1.00    |
| Dementia                                          | 127 (8.3%)               | 156 (6.0%)                            | 0.006   |
| Metastatic Cancer                                 | 29 (1.9%)                | 51 (2.0%)                             | 0.84    |
| Length of Hospitalization (days),<br>median (IQR) | 4 (3-7)                  | 5 (3-7)                               | 0.21    |
| Used Intensive Care                               | 354 (23.0%)              | 592 (22.9%)                           | 0.94    |
| Mortality                                         |                          |                                       |         |
| In-hospital                                       | 91 (5.9%)                | 86 (3.3%)                             | <0.001  |
| 30 days                                           | 200 (13.0%)              | 212 (8.2%)                            | <0.001  |
| 90 days                                           | 391 (25.4%)              | 420 (16.3%)                           | <0.001  |
| 1-year                                            | 740 (48.1%)              | 873 (33.8%)                           | <0.001  |

**Table S3:** Characteristics of Pneumonia Patients and Hospitalizations, by BMI

|                                                   | Normal<br>BMI<br>N=1,736 | Overweight or Obese<br>BMI<br>N=2,152 | p-value |
|---------------------------------------------------|--------------------------|---------------------------------------|---------|
| Age (years), median (IQR)                         | 81 (73-87)               | 77 (70-83)                            | <0.001  |
| Male, N(%)                                        | 838 (48.3%)              | 1,062 (49.4%)                         | 0.14    |
| Race, N(%)                                        |                          |                                       | <0.001  |
| White/Caucasian                                   | 1,478 (85.1%)            | 1,698 (78.9%)                         |         |
| Black/African American                            | 206 (11.9%)              | 381 (17.7%)                           |         |
| Other                                             | 52 (3.0%)                | 73 (3.4%)                             |         |
| Married/Partnered, N(%)                           | 771 (44.4%)              | 1,105 (51.4%)                         | <0.001  |
| Wealth, N(%)                                      |                          |                                       | 0.02    |
| Net neg. or zero                                  | 228 (13.1%)              | 284 (13.2%)                           |         |
| Quartile 1                                        | 546 (31.5%)              | 732 (34.0%)                           |         |
| Quartile 2                                        | 399 (23.0%)              | 538 (25.0%)                           |         |
| Quartile 3                                        | 323 (18.6%)              | 320 (14.9%)                           |         |
| Quartile 4                                        | 240 (13.8%)              | 278 (12.9%)                           |         |
| Income, N(%)                                      |                          |                                       | 0.002   |
| None                                              | 675 (38.9%)              | 788 (36.6%)                           |         |
| Quartile 1                                        | 574 (33.1%)              | 711 (33.0%)                           |         |
| Quartile 2                                        | 322 (18.6%)              | 396 (18.4%)                           |         |
| Quartile 3                                        | 133 (7.7%)               | 182 (8.5%)                            |         |
| Quartile 4                                        | 32 (1.8%)                | 75 (3.5%)                             |         |
| Weighted Charlson Index                           | 3 (1-5)                  | 3 (2-5)                               | <0.001  |
| Congestive Heart Failure                          | 828 (47.7%)              | 1,114 (51.8%)                         | 0.01    |
| Dementia                                          | 262 (15.1%)              | 219 (10.2%)                           | <0.001  |
| Metastatic Cancer                                 | 89 (5.1%)                | 110 (5.1%)                            | 0.98    |
| Length of Hospitalization (days),<br>median (IQR) | 5 (3-8)                  | 5 (3-8)                               | 0.58    |
| Used Intensive Care                               | 312 (18.0%)              | 474 (22.0%)                           | 0.002   |
| Mortality                                         |                          |                                       |         |
| In-hospital                                       | 208 (12.0%)              | 194 (9.0%)                            | 0.003   |
| 30 days                                           | 349 (20.1%)              | 293 (13.6%)                           | <0.001  |
| 90 days                                           | 503 (29.0%)              | 449 (20.9%)                           | <0.001  |
| 1-year                                            | 785 (45.2%)              | 749 (34.8%)                           | <0.001  |

**Table S4:** Characteristics of AMI Patients and Hospitalizations, by BMI

|                                                   | Normal<br>BMI<br>N=698 | Overweight or Obese<br>BMI<br>N=1,232 | p-value |
|---------------------------------------------------|------------------------|---------------------------------------|---------|
| Age (years), median (IQR)                         | 80.5 (73-86)           | 75 (69-82)                            | <0.001  |
| Male, N(%)                                        | 333 (47.7%)            | 705 (57.2%)                           | <0.001  |
| Race, N(%)                                        |                        |                                       | <0.001  |
| White/Caucasian                                   | 617 (88.4%)            | 994 (80.7%)                           |         |
| Black/African American                            | 63 (9.0%)              | 186 (15.1%)                           |         |
| Other                                             | 18 (2.6%)              | 52 (4.2%)                             |         |
| Married/Partnered, N(%)                           | 350 (50.1%)            | 728 (59.1%)                           | <0.001  |
| Wealth, N(%)                                      |                        |                                       | 0.17    |
| Net neg. or zero                                  | 63 (9.0%)              | 137 (11.1%)                           |         |
| Quartile 1                                        | 181 (25.9%)            | 356 (28.9%)                           |         |
| Quartile 2                                        | 163 (23.4%)            | 283 (23.0%)                           |         |
| Quartile 3                                        | 158 (22.6%)            | 257 (20.9%)                           |         |
| Quartile 4                                        | 133 (19.1%)            | 199 (16.2%)                           |         |
| Income, N(%)                                      |                        |                                       | 0.001   |
| None                                              | 259 (37.1%)            | 392 (31.8%)                           |         |
| Quartile 1                                        | 239 (34.2%)            | 370 (30.0%)                           |         |
| Quartile 2                                        | 114 (16.3%)            | 276 (22.4%)                           |         |
| Quartile 3                                        | 66 (9.5%)              | 147 (11.9%)                           |         |
| Quartile 4                                        | 20 (2.9%)              | 47 (3.8%)                             |         |
| Weighted Charlson Index                           | 3 (2-5)                | 3 (2-5)                               | 0.04    |
| Congestive Heart Failure                          | 396 (56.7%)            | 666 (54.0%)                           | 0.27    |
| Dementia                                          | 54 (7.7%)              | 52 (4.2%)                             | <0.001  |
| Metastatic Cancer                                 | 12 (1.7%)              | 15 (1.2%)                             | 0.36    |
| Length of Hospitalization (days),<br>median (IQR) | 5 (3-8)                | 5 (3-8)                               | 0.52    |
| Used Intensive Care                               | 389 (55.7%)            | 735 (59.7%)                           | 0.09    |
| Mortality                                         |                        |                                       |         |
| In-hospital                                       | 72 (10.3%)             | 110 (8.9%)                            | 0.32    |
| 30 days                                           | 124 (17.8%)            | 161 (13.1%)                           | 0.005   |
| 90 days                                           | 173 (24.8%)            | 207 (16.8%)                           | <0.001  |
| 1-year                                            | 277 (39.7%)            | 315 (25.6%)                           | <0.001  |

**Table S5:** Numbers and Adjusted Hazards (or Odds) Ratios for Mortality in Primary and Sensitivity Analyses

| Analysis                                                   | Methodology                                                                                                                                    | CHF   |                         | Pneumonia |                         | AMI   |                         |
|------------------------------------------------------------|------------------------------------------------------------------------------------------------------------------------------------------------|-------|-------------------------|-----------|-------------------------|-------|-------------------------|
|                                                            |                                                                                                                                                | N     | Adjusted HR (95% CI)    | N         | Adjusted HR (95% CI)    | N     | Adjusted HR (95% CI)    |
| <b>1-Year Mortality</b>                                    |                                                                                                                                                |       |                         |           |                         |       |                         |
| Principal                                                  | Multivariable Cox Proportional Hazards Model with all hospitalizations and robust standard errors.                                             | 4,287 | <b>0.68</b> (0.59-0.79) | 4,182     | <b>0.74</b> (0.64-0.85) | 2,001 | <b>0.65</b> (0.53-0.80) |
| Sensitivity #1                                             | Multivariable Cox Proportional Hazards Model with all hospitalizations with stable or increasing weight trajectory and robust standard errors. | 3,500 | <b>0.71</b> (0.60-0.84) | 3,402     | <b>0.78</b> (0.67-0.91) | 1,724 | <b>0.62</b> (0.50-0.78) |
| Sensitivity #2                                             | Multivariable Cox Proportional Hazards Model with all hospitalizations, adjustment for illness severity, and robust standard errors.           | 4,287 | <b>0.66</b> (0.57-0.77) | 4,182     | <b>0.72</b> (0.62-0.83) | 2,001 | <b>0.71</b> (0.57-0.88) |
| Sensitivity #3                                             | Multivariable Logistic Regression Model of all hospitalizations with robust standard errors.                                                   | 4,287 | <b>0.60</b> (0.50-0.73) | 4,182     | <b>0.68</b> (0.58-0.81) | 2,001 | <b>0.60</b> (0.48-0.76) |
| Sensitivity #4                                             | Multivariable Cox Proportional Hazards Model with one randomly selected hospitalization per person.                                            | 2,258 | <b>0.72</b> (0.63-0.83) | 2,933     | <b>0.75</b> (0.66-0.84) | 1,565 | <b>0.60</b> (0.49-0.72) |
| Sensitivity #5                                             | Multivariable Cox Proportional Hazards Model among age and sex-matched pairs, with robust standard errors.                                     | 2,954 | <b>0.67</b> (0.57-0.77) | 3,120     | <b>0.73</b> (0.64-0.84) | 1,330 | <b>0.66</b> (0.52-0.84) |
| Sensitivity #6                                             | Multivariable Cox Proportional Hazards Model with adjustment for functional limitations and co-morbid disease, with robust standard errors.    | 3,684 | <b>0.67</b> (0.57-0.78) | 3,576     | <b>0.75</b> (0.64-0.86) | 1,627 | <b>0.69</b> (0.55-0.87) |
| <b>5-Year Mortality, Conditional on Survival to 1 Year</b> |                                                                                                                                                |       |                         |           |                         |       |                         |
| Principal                                                  | Multivariable Cox Proportional Hazards Model with all hospitalizations and robust standard errors.                                             | 2,567 | 0.98 (0.84-1.14)        | 2,472     | 0.92 (0.81-1.05)        | 1,362 | 0.90 (0.71-1.13)        |
| Sensitivity #1                                             | Multivariable Cox Proportional Hazards Model with all hospitalizations with stable or increasing weight trajectory and robust standard errors. | 2,149 | 0.95 (0.80-1.13)        | 2,081     | 0.89 (0.76-1.03)        | 1,195 | 0.95 (0.74-1.23)        |
| Sensitivity #2                                             | Multivariable Cox Proportional Hazards Model with all hospitalizations, adjustment for illness severity, and robust standard errors.           | 2,567 | 0.97 (0.83-1.13)        | 2,472     | 0.91 (0.80-1.04)        | 1,362 | 0.91 (0.72-1.15)        |

|                |                                                                                                                                             |       |                  |       |                  |       |                  |
|----------------|---------------------------------------------------------------------------------------------------------------------------------------------|-------|------------------|-------|------------------|-------|------------------|
| Sensitivity #3 | Multivariable Logistic Regression Model of all hospitalizations with robust standard errors.                                                | 2,212 | 1.02 (0.77-1.35) | 2,108 | 0.82 (0.65-1.02) | 1,130 | 0.90 (0.65-1.25) |
| Sensitivity #4 | Multivariable Cox Proportional Hazards Model with one randomly selected hospitalization per person.                                         | 1,476 | 0.96 (0.83-1.11) | 1,822 | 0.91 (0.80-1.05) | 1,075 | 0.85 (0.68-1.06) |
| Sensitivity #5 | Multivariable Cox Proportional Hazards Model among age and sex-matched pairs.                                                               | 1,554 | 1.00 (0.86-1.17) | 1,756 | 0.90 (0.78-1.04) | 824   | 0.85 (0.65-1.11) |
| Sensitivity #6 | Multivariable Cox Proportional Hazards Model with adjustment for functional limitations and co-morbid disease, with robust standard errors. | 2,177 | 0.90 (0.76-1.07) | 2,076 | 0.92 (0.79-1.06) | 1,111 | 0.88 (0.68-1.15) |

The referent group in BMI 18.5 to <25.0 kg/m<sup>2</sup>. All models adjust for age, sex, race, marital status, education, smoking status, admission year, number of hospitalizations, household wealth, and household income. Bolded values are statistically significant,  $p < 0.05$ .



**Table S6:** Adjusted Hazard Ratios from Primary Analysis, by overweight, obese, and severely obese BMI

| Adjusted HR                                                | CHF                     | Pneumonia               | AMI                     |
|------------------------------------------------------------|-------------------------|-------------------------|-------------------------|
| <b>1-Year Mortality</b>                                    |                         |                         |                         |
| Overweight                                                 | <b>0.66</b> (0.56-0.79) | <b>0.75</b> (0.64-0.87) | <b>0.63</b> (0.50-0.79) |
| Obese                                                      | <b>0.71</b> (0.57-0.89) | <b>0.75</b> (0.61-0.93) | <b>0.67</b> (0.48-0.94) |
| Severely obese                                             | <b>0.70</b> (0.54-0.91) | <b>0.65</b> (0.49-0.86) | 0.74 (0.48-1.12)        |
| <b>5-Year Mortality, Conditional on Survival to 1 Year</b> |                         |                         |                         |
| Overweight                                                 | 0.95 (0.80-1.13)        | 0.94 (0.82-1.09)        | 0.83 (0.65-1.07)        |
| Obese                                                      | 1.09 (0.89-1.34)        | 0.83 (0.67-1.03)        | 0.94 (0.67-1.31)        |
| Severely obese                                             | 0.90 (0.66-1.20)        | 0.90 (0.68-1.19)        | 1.30 (0.85-1.99)        |

The models adjust for age, sex, race, marital status, education, smoking status, admission year, number of hospitalizations, household wealth, and household income. BMI is classified as overweight ( $\geq 25.0$  to  $< 30.0$  kg/m<sup>2</sup>), obese ( $\geq 30.0$  to  $< 35.0$  kg/m<sup>2</sup>), and severely obese ( $\geq 35.0$  kg/m<sup>2</sup>). The referent group in BMI 18.5 to  $< 25.0$  kg/m<sup>2</sup>.

Bolded values are statistically significant,  $p < 0.05$ .

**Table S7:** Adjusted Hazard Ratios from Primary Analysis, with alternate referent groups

| Adjusted Hazard Ratios for 1-Year Mortality, with alternate referent groups |                                           |                                               |                                               |
|-----------------------------------------------------------------------------|-------------------------------------------|-----------------------------------------------|-----------------------------------------------|
|                                                                             | Primary Analysis:<br>Ref BMI 18.5 to <25. | Sensitivity Analysis:<br>Ref BMI 20.0 to <25. | Sensitivity Analysis:<br>Ref BMI 22.0 to <25. |
| CHF                                                                         | <b>0.68</b> (0.59, 0.79)                  | <b>0.70</b> (0.60, 0.82)                      | <b>0.74</b> (0.62, 0.88)                      |
| Pneumonia                                                                   | <b>0.74</b> (0.64, 0.85)                  | <b>0.77</b> (0.67, 0.89)                      | 0.85 (0.71, 1.00)                             |
| AMI                                                                         | <b>0.65</b> (0.53, 0.80)                  | <b>0.69</b> (0.56, 0.86)                      | <b>0.67</b> (0.53, 0.85)                      |
| Adjusted Hazard Ratios for 5-Year Mortality, with alternate referent groups |                                           |                                               |                                               |
|                                                                             | Primary Analysis:<br>Ref BMI 18.5 to <25. | Sensitivity Analysis:<br>Ref BMI 20.0 to <25. | Sensitivity Analysis:<br>Ref BMI 22.0 to <25. |
| CHF                                                                         | 0.98 (0.84, 1.14)                         | 1.03 (0.88, 1.21)                             | 1.09 (0.90, 1.32)                             |
| Pneumonia                                                                   | 0.92 (0.81-1.05)                          | 0.98 (0.85, 1.13)                             | 1.02 (0.87, 1.20)                             |
| AMI                                                                         | 0.90 (0.71-1.13)                          | 0.89 (0.71, 1.13)                             | 0.88 (0.68, 1.15)                             |

The models adjust for age, sex, race, marital status, education, smoking status, admission year, number of hospitalizations, household wealth, and household income.  
 Bolded numbers are statistically significant,  $p < 0.05$ .

## References

1. Keenan PS, Normand S-LT, Lin Z, et al. An administrative claims measure suitable for profiling hospital performance on the basis of 30-day all-cause readmission rates among patients with heart failure. *Circ Cardiovasc Qual Outcomes* 2008;1(1):29–37.
2. Epstein AJ, Rathore SS, Krumholz HM, Volpp KGM. Volume-based referral for cardiovascular procedures in the United States: a cross-sectional regression analysis. *BMC Health Serv Res* 2005;5:42.
3. Krumholz HM, Wang Y, Mattera JA, et al. An administrative claims model suitable for profiling hospital performance based on 30-day mortality rates among patients with an acute myocardial infarction. *Circulation* 2006;113(13):1683–92.
4. Lindenauer PK, Lagu T, Shieh MS, Pekow PS, Rothberg MB. Association of diagnostic coding with trends in hospitalizations and mortality of patients with pneumonia, 2003-2009. *JAMA* 2012;307(13):1405–13.
5. Valley TS, Sjoding MW, Ryan AM, Iwashyna TJ, Cooke CR. Association of Intensive Care Unit Admission With Mortality Among Older Patients With Pneumonia. *JAMA* 314(12):1272–9.
